# Supplementary figures and images for: Correlating Synthesis Parameters to Morphological Entities: Predictive Modeling of Biopolymer Aerogels
Source: MDPI journal article supplement (doi:10.3390/ma11091670), 2018-09-09

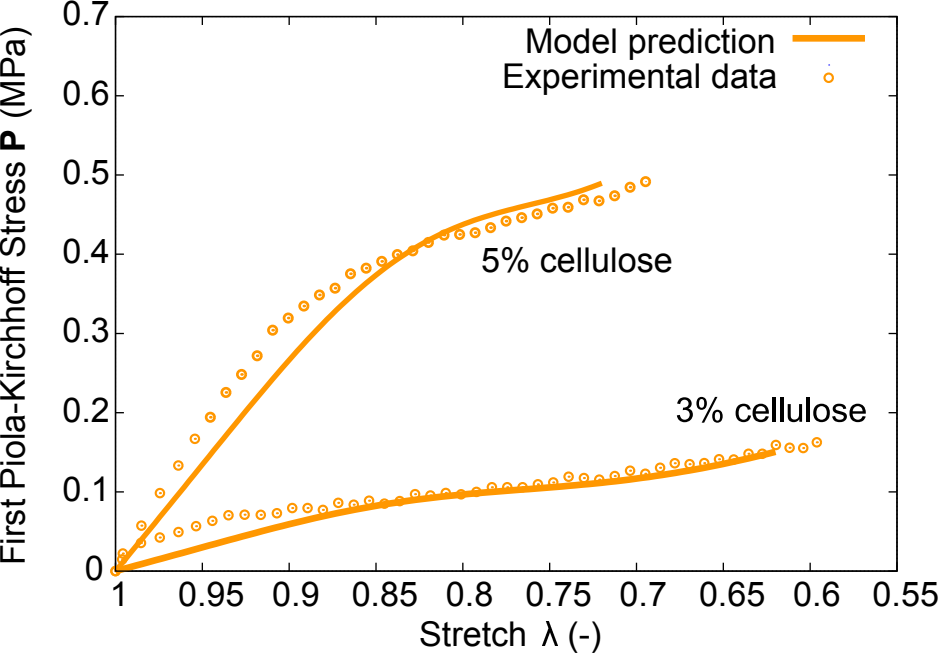

Supplement: s1 [file s1]

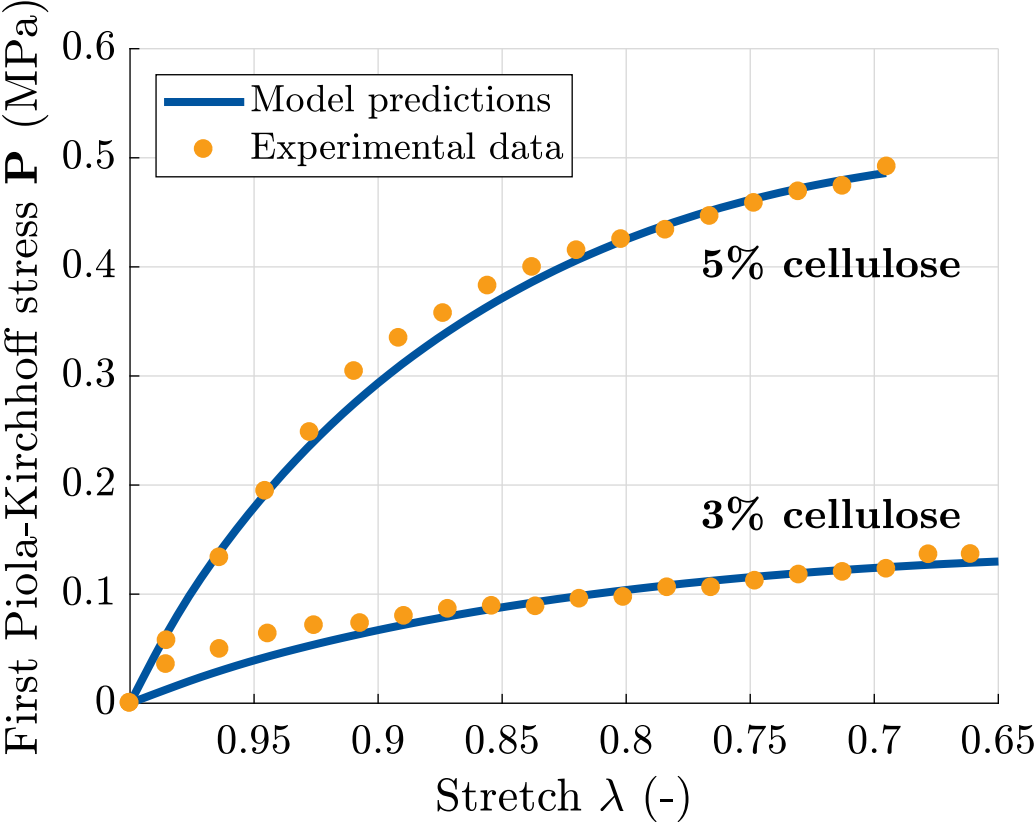

Supplement: s1 [file s1]
